# Supplementary material for: Evaluation of maternal and child care continuum in Guinea: a secondary analysis of two demographic and health surveys using the composite coverage index (CCI)
Source: Springer Nature journal article supplement (doi:10.1186/s12884-023-05718-y), 2023-05-27
Supplement: MOESM1 [file 25415428]

# Analysis of maternal and child health indicators: the composite coverage index (CCI) used in Guinea from 2012 to 2018.

## Authors' affiliation

Diao CISSE<sup>1,9\*</sup>, Almamy Amara TOURE<sup>\*,‡,1,2</sup>, Abdourahamane DIALLO<sup>3</sup>, Juste Aristite GOUNGOUNGA<sup>4,5</sup>, Jean Jaques Olivier KADIO<sup>1,6</sup>, Ibrahima BARRY<sup>2</sup>, Souleymane BERETE<sup>7</sup>, Aboubacar Sidiki MAGASSOUBA<sup>1</sup>, Souleymane Hassane HAROUNA<sup>8</sup>, Alseny Yarie CAMARA<sup>2</sup>, Younoussa SYLLA<sup>2</sup>, Kola CISSE<sup>9</sup>, Maïmouna SIDIBE<sup>10</sup>, Abdoulaye TOURE<sup>6</sup>, Alexandre DELAMOU<sup>1,2,11</sup>.

\* These authors contributed equally to this work.

1 Department of Public Health, Faculty of Health Sciences and Techniques, Gamal Abdel Nasser University, Conakry, Guinea. 2 Centre National de Formation et Recherche en Santé Rurale de Maférinyah. 3 Centre Hospitalo-Universitaire Ignace Deen, Service de Gynécologie, Conakry, Guinée. 4 Université de Bourgogne, Registre Bourguignon des cancers digestifs, Dijon, France. 5 Inserm UMR1231, UMR1231, Dijon, France. 6 Centre de Recherche et de Formation en Infectiologie de Guinée. 7 Catholic Relief Service. 8 Action Damien Guinée. 9 Médecins Sans Frontière Espagne, Mali. 10 Centre Hospitalo-Universitaire Fann, Service de Maladies Infectieuses

---

‡ **Corresponding author**

Almamy Amara TOURE, Centre National de Formation et de Recherche en Santé Rurale de Maferinyah, Forecariah, Guinea, [almamy@maferinyah.org](mailto:almamy@maferinyah.org)

et Tropicales, Dakar, Sénégal. 11 Centre d'Excellence Africain pour la Prévention et le Contrôle des Maladies Transmissibles (CEA-PCMT), Gamal Abdel Nasser University, Guinea

**Address's email of the authors**

Diao CISSE : [diaosg49@gmail.com](mailto:diaosg49@gmail.com)

Almamy Amara TOURE : [almamy@maferinyah.org](mailto:almamy@maferinyah.org)

Abdourahmane DIALLO : [adiallo69gn@yahoo.fr](mailto:adiallo69gn@yahoo.fr)

Juste Aristite GOUNGOUNGA : [goungoungajuste@gmail.com](mailto:goungoungajuste@gmail.com)

Kadio Jean Jaques Olivier KADIO : [drkadiojolivier@gmail.com](mailto:drkadiojolivier@gmail.com)

Ibrahima BARRY: [barryibra7@gmail.com](mailto:barryibra7@gmail.com)

Souleymane BERETE : [sberete48@gmail.com](mailto:sberete48@gmail.com)

Aboubacar Sidiki MAGASSOUBA : [magasbakary01@yahoo.fr](mailto:magasbakary01@yahoo.fr)

Souleymane Hassane HAROUNA : [hassoul20@yahoo.fr](mailto:hassoul20@yahoo.fr)

Alsény Yarie CAMARA : [camaraall35@gmail.com](mailto:camaraall35@gmail.com)

Younoussa SYLLA : [doctorsyllayounoussa@gmail.com](mailto:doctorsyllayounoussa@gmail.com)

Kola CISSE : [cissekola3@gmail.com](mailto:cissekola3@gmail.com)

Maimouna SIDIBE : [maisidibe.kl@gmail.com](mailto:maisidibe.kl@gmail.com)

Abdoulaye TOURE : [abdoulayek2002@yahoo.fr](mailto:abdoulayek2002@yahoo.fr)

Alexandre DELAMOU : [adelamou@maferinyah.org](mailto:adelamou@maferinyah.org)

```
library(foreign)
kr12<- read.spss("D:\\MOOC\\GNKR62FL.sav",to.data.frame = TRUE)
kr12 <- subset(kr12, select = c("V001", "V005", "V007", "V012", "V013", "V021",
                              "V022","V023", "V024", "V025", "V026", "V130", "V131", "V136", "V149","V151",
                              "V152", "V157", "V158", "V159", "V190","V191", "V218", "V225",
                              "V501","V502","V701",
                              "V714", "V626", "V313",
                              "B4","B5","B8","MIDX","H1","H2","H3","H5","H7","H9","H10","H11","H13","H14",
                              "H31","H32A","H32B","H32C","H32E","H32I","H32J","H32K","H32L", "H32N",
                              "H32S","H32Y",
                              "M2A","M2B","M2C","M3A","M3B","M3C", "M13", "M14"))

#Filtrer les enfants vivants
library(nlme)
library(dplyr)
#####Filtering on living child
krv12 <- filter(kr12,kr12$B5=="Yes")
#####Filtering by age more than a year
krv12 <- filter(kr12,kr12$B8>=1)
```

```
#####checking for missing values
```

```
sapply(krv12, function(x) sum(is.na(x)))
```

```
#####Recoding variables before imputation
```

```
summary(krv12$V012)
```

```
table(krv12$V012)
```

```
##Recoding for living child and household number
```

```
summary(krv12$`V218`)
```

```
table(krv12$`V218`)
```

```
summary(krv12$`V136`)
```

```
table(krv12$`V136`)
```

```
str(krv12)
```

```
summary(krv12)
```

```
sapply(krv12, function(x) sum(is.na(x)))
```

```
#####Reducing data sets
```

```
#####recoding some variables
```

```
levels(krv12$H2)
```

```
table(krv12$H2)
```

```
levels(krv12$H2) <- c("No", "Yes", "Yes", "Yes", "No")
```

```
levels(krv12$H2)
```

```
table(krv12$H2)
```

```
levels(krv12$H3)
```

```
table(krv12$H3)
```

```
levels(krv12$H3) <- c("No", "Yes", "Yes", "Yes", "No")
```

```
levels(krv12$H3)
```

```
levels(krv12$H5)
table(krv12$H5)
levels(krv12$H5) <- c("No", "Yes","Yes", "Yes", "No")
levels(krv12$H5)
table(krv12$H5)
```

```
levels(krv12$H7)
table(krv12$H7)
levels(krv12$H7) <- c("No", "Yes","Yes", "Yes", "No")
levels(krv12$H7)
table(krv12$H7)
```

```
levels(krv12$H9)
table(krv12$H9)
levels(krv12$H9) <- c("No", "Yes","Yes", "Yes", "No")
levels(krv12$H9)
table(krv12$H9)
```

```
levels(krv12$H10)
table(krv12$H10)
levels(krv12$H10) <- c("No", "Yes", "No")
table(krv12$H10)
```

```
levels(krv12$H11)
table(krv12$H11)
levels(krv12$H11) <- c("No", "Yes", "Yes", "No")
table(krv12$H11)
```

```
levels(krv12$H13)
table(krv12$H13)
levels(krv12$H13) <- c("No", "Yes", "Yes", "No")
table(krv12$H13)
```

```
levels(krv12$H14)
table(krv12$H14)
levels(krv12$H14) <- c("No", "Yes", "Yes", "No")
table(krv12$H14)
```

```
levels(krv12$H31)
levels(krv12$H31) <- c("No", "Yes", "Yes", "No")
table(krv12$H31)
```

#####Information access

```
levels(krv12$V157)
levels(krv12$V157) <- c("noaccess", "access", "access", "access")
table(krv12$V157)
```

```
levels(krv12$V158)
levels(krv12$V158) <- c("noaccess", "access", "access", "access")
table(krv12$V158)
```

```
levels(krv12$V159)
levels(krv12$V159) <- c("noaccess", "access", "access", "access")
table(krv12$V159)
```

```
levels(krv12$V502)
table(krv12$V502)
levels(krv12$V502) <- c("single", "married", "single")
```

```
table(krv12$V502)
```

```
levels(krv12$V149)
```

```
levels(krv12$V149) <- c("noeducation", "primary", "primary", "secondary",  
"secondary", "higher")
```

```
table(krv12$V149)
```

```
#####partner education
```

```
levels(krv12$V701)
```

```
levels(krv12$V701) <- c("noeducation", "primary", "secondary", "higher", "noeducation")
```

```
table(krv12$V701)
```

```
levels(krv12$`V152`)
```

```
levels(krv12$`V152`) <- c("18", "19", "20", "21", "22", "23", "24", "25", "26", "27",  
"28", "29", "30", "31", "32", "33", "34", "35", "36", "37", "38", "39",  
"40", "41", "42", "43", "44", "45", "46", "47", "48", "49", "50", "51",  
"52", "53", "54", "55", "56", "57", "58", "59", "60", "61", "62", "63",  
"64", "65", "66", "67", "68", "69", "70", "71", "72", "73", "74", "75",  
"76", "77", "78", "79", "80", "81", "82", "83", "84", "85", "86", "87",  
"88", "89", "90", "91", "92", "95", "95", "95")
```

```
krv12$`V152` <- as.numeric(levels(krv12$`V152`))[krv12$`V152`]
```

```
table(krv12$`V152`)
```

```
summary(krv12$`V152`)
```

```
table(krv12$`V152`)
```

```
#####anc
```

```
table(krv12$`M14`)
```

```
levels(krv12$`M14`)
```

```

levels(krv12$`M14`) <-
c("0","1","10","11","12","13","14","15","16","17","18","2","20","3","4","5","6","7","8","9","")
table(krv12$`M14`)

krv12$`M14` <- as.numeric(levels(krv12$`M14`)[krv12$`M14`])
table(krv12$`M14`)

#####

summary(krv12$`M14`)

#krv12$`M14` <- cut(krv12$`M14`,breaks = c(0,1,3,9),include.lowest = TRUE)
table(krv12$`M14`)

#####time first anc

levels(krv12$`M13`)
table(krv12$`M13`)

levels(krv12$`M13`) <- c("0","1","2","3","4","5","6","7","8","9","0")
table(krv12$`M13`)

krv12$`M13` <- as.numeric(levels(krv12$`M13`)[krv12$`M13`])
table(krv12$`M13`)

summary(krv12$`M13`)

#krv12$`M13` <- cut(krv12$`M13`,breaks = c(1,3,6,9),include.lowest = TRUE, labels = c("first-
trim","second-trim","third-trim"))
table(krv12$`M13`)

#ORT#####For diarrhea
krv12$ORT[krv12$H11=="Yes" & krv12$H13=="No" &krv12$H14=="No"] <- "0"
krv12$ORT[krv12$H11=="Yes" & krv12$H13=="Yes" |krv12$H14=="Yes"] <- "1"

levels(krv12$ORT)
krv12$ORT <- factor(krv12$ORT)
table(krv12$ORT)

krv12$ORT <- factor((krv12$ORT),levels = c("0","1"))
krv12$ORT<-as.numeric(levels(krv12$ORT)[krv12$ORT])

```



```
table(krv12$SORT)
```

```
#####CPNM is care seeking for pneumonia
```

```
krv12$CPNM[krv12$H31=="Yes" &
```

```
  krv12$H32A=="No" &
```

```
  krv12$H32B=="No" &
```

```
  krv12$H32C=="No" &
```

```
  krv12$H32E=="No" &
```

```
  krv12$H32J=="No" &
```

```
  krv12$H32L=="No" &
```

```
  krv12$H32N=="No" &
```

```
  krv12$H32S=="No" ] <-
```

```
"0"
```

```
krv12$CPNM[krv12$H31=="Yes" &
```

```
  krv12$H32A=="Yes" |
```

```
  krv12$H32B=="Yes" |
```

```
  krv12$H32C=="Yes" |
```

```
  krv12$H32E=="Yes" |
```

```
  krv12$H32J=="Yes" |
```

```
  krv12$H32L=="Yes" |
```

```
  krv12$H32N=="Yes" |
```

```
  krv12$H32S=="Yes" ] <-
```

```
"1"
```

```
krv12$CPNM <- factor(krv12$CPNM)
```

```
sapply(krv12, function(x) sum(is.na(x)))
```

```
#####Removing uninteresting variables for imputation
```

```
krv12d <- krv12[-c(1:3,5,7:13,22,25:26,29:30,32,34:35,42:55)]
```

```

krv12d1 <- krV12[c(1:3,6:7,9:10,12:13,21:22,26,29,34)]
#####Vaccination status

library(mice)

init = mice(krv12d, maxit=0)
#init = mice(krv18d, maxit=20)

meth1 = init$method
#meth1[which(meth1=="pmm")]<-"norm.boot"
#meth1[which(meth1=="logreg")]<-"logreg.boot"

meth1

predM = init$predictorMatrix
#predM[, c("V001")] <- 0
#predM[, c("V005")] <- 0
#predM[, c("V191")] <- 0

krv12d = mice(krv12d,pred=predM,seed = 15422,m = 5)
#krv18d = mice(krv18d,pred=predM,seed = 15422,m = 10)
#imp1=mice(krv18d,print=FALSE)
#####Inspect the convergence of the algorithm
plot(krv12d,layout = c(4,4))####based on fig we need more iterations
#####Inspect diagnostics

densityplot(krv12d)

densityplot(krv12d, ~ CPNM+M13+M14,
            layout = c(3,2))

bwplot(krv12d)

krv12d <- complete(krv12d)

#####saving workspace
#save.image(file =("D:\\MOOC\\diao1.RData"))

#####Loading workspace
#load("D:\\MOOC\\diao1.RData")

```

```

str(krv12d)

sapply(krv12d, function(x) sum(is.na(x)))

summary(krv12d)

#####Merging dataframes

diaoc <- cbind(krv12d1,krv12d)

sapply(diaoc, function(x) sum(is.na(x)))

#####Following code not check!!!!!!!!!!!!!!

#write.csv2(diaoc,file = "D:\\MOOC\\diaod1.csv")

krv12 <- read.csv2("D:\\MOOC\\diaod1.csv", header = T,
                 stringsAsFactors=TRUE)

library(dplyr)

#####Including missing variables

#krv18 <- cbind(krv18,krv18d1[c(13)])

str(krv12)

summary(krv12)

sapply(krv12, function(x) sum(is.na(x)))

#####religion

library(na.tools)

levels(krv12$V130)

levels(krv12$V130) <- c("noreligion","Christian","muslim","noreligion")

krv12$V130 <- na.bootstrap(krv12$V130)

table(krv12$V130)

levels(krv12$V131)

levels(krv12$V131) <- c("guerzÃ©","kissi","malinkÃ©","other","peulh","soussou","toma")

table(krv12$V131)

```

```
#####Antenatal care
```

```
krv12$ANCS[krv12$M2A=="No" &krv12$M2B=="No" & krv12$M2C=="No"] <- "0"  
krv12$ANCS[krv12$M2A=="Yes" | krv12$M2B=="Yes" | krv12$M2C=="Yes"] <- "1"  
table(krv12$ANCS)
```

```
table(krv12$ANCS)  
levels(krv12$ANCS)  
krv12$ANCS <- factor(krv12$ANCS)  
krv12$ANCS <- factor((krv12$ANCS),levels = c("0","1"))  
krv12$ANCS<-as.numeric(levels(krv12$ANCS)[krv12$ANCS])  
table(krv12$ANCS)
```

```
#####Delivery/
```

```
krv12$SBA[krv12$M3A=="No" & krv12$M3B=="No" & krv12$M3C=="No"] <- "0"  
krv12$SBA[krv12$M3A=="Yes" | krv12$M3B=="Yes" | krv12$M3C=="Yes"] <- "1"  
table(krv12$SBA)  
krv12$SBA <- factor(krv12$SBA)  
levels(krv12$SBA)  
krv12$SBA <- factor((krv12$SBA),levels = c("0","1"))  
krv12$SBA<-as.numeric(levels(krv12$SBA)[krv12$SBA])  
krv12$SBA<-as.numeric(krv12$SBA)  
table(krv12$SBA)
```

```
summary(krv12$V012)  
krv12$V012 <- cut(krv12$V012,breaks = c(15,18,30,40,49),include.lowest = TRUE)  
summary(krv12$V218)  
krv12$V218 <- cut(krv12$V218,breaks = c(1,2,4,7,12),include.lowest = TRUE)  
summary(krv12$V136)  
krv12$V136 <- cut(krv12$V136,breaks = c(1,5,10,42),include.lowest = TRUE)  
summary(krv12$V152)
```

```
krv12$V152<- cut(krv12$V152,breaks = c(16,25,40,60,95),include.lowest = TRUE)
```

```
library(forcats)
```

```
levels(krv12$V626)
```

```
krv12$V626 <- fct_recode(krv12$V626,
```

```
  NULL = "Never had sex",
```

```
  "No"= "Unmet need for spacing",
```

```
  "No" = "Unmet need for limiting",
```

```
  "Yes"= "Using for spacing",
```

```
  "Yes"= "Using for limiting",
```

```
  NULL = "Spacing failure",
```

```
  NULL = "Limiting failure",
```

```
  NULL = "No unmet need",
```

```
  NULL = "Not married and no sex in last 30 days",
```

```
  NULL = "Infecund, menopausal")
```

```
krv12$V626 <- na.replace(krv12$V626,.na = "No")
```

```
levels(krv12$V626)
```

```
table(krv12$V626)
```

```
#####Family
```

```
#krv12$FPS <- NA
```

```
krv12$FPS[krv12$V626=="No"] <- "0"
```

```
krv12$FPS[krv12$V626=="Yes"] <- "1"
```

```
levels(krv12$FPS)
```

```
krv12$FPS <- factor(krv12$FPS)
```

```
table(krv12$FPS)
```

```
krv12$FPS <- factor((krv12$FPS),levels = c("0","1"))
```

```
krv12$FPS<-as.numeric(levels(krv12$FPS)[krv12$FPS])
```

```
table(krv12$FPS)
```

```
#Trois doses DTP
#krv12$DPT3 <- NA
krv12$DPT3[krv12$H3=="No" |krv12$H5=="No" |krv12$H7=="No"] <-"0"
krv12$DPT3[krv12$H3=="Yes" &krv12$H5=="Yes" & krv12$H7=="Yes"] <-"1"
levels(krv12$DPT3)
krv12$DPT3 <- factor(krv12$DPT3)
table(krv12$DPT3)
krv12$DPT3 <- factor((krv12$DPT3),levels = c("0","1"))
krv12$DPT3<-as.numeric(levels(krv12$DPT3)[krv12$DPT3])
table(krv12$DPT3)
```

```
#Rougole
#krv12$MSL <- NA
krv12$MSL[krv12$H9=="No"] <- "0"
krv12$MSL[krv12$H9=="Yes"] <- "1"
```

```
levels(krv12$MSL)
krv12$MSL <- factor(krv12$MSL)
table(krv12$MSL)
krv12$MSL <- factor((krv12$MSL),levels = c("0","1"))
krv12$MSL<-as.numeric(levels(krv12$MSL)[krv12$MSL])
table(krv12$MSL)
```

```
#BCG
#krv12$BCG <- krV12$H2
#krv12$BCG <- NA
krv12$BCG[krv12$H2=="No"] <-"0"
krv12$BCG[krv12$H2=="Yes"] <-"1"
table(krv12$BCG)
```

```
levels(krv12$BCG)
krv12$BCG <- factor(krv12$BCG)
table(krv12$BCG)
krv12$BCG <- factor((krv12$BCG),levels = c("0","1"))
krv12$BCG<-as.numeric(levels(krv12$BCG)[krv12$BCG])
table(krv12$BCG)
```

```
#####Last filtering with family planning
```

```
krv12d1<- filter(krv12,krv12$FPS==0)
krv12d2<- filter(krv12,krv12$FPS==1)
```

```
#####Merging the two dataframes
```

```
krv12 <- rbind(krv12d1,krv12d2)
```

```
###ICC
```

```
attach(krv12)
```

```
#detach(krv18d)
```

```
#krv18d$a <- FPS
```

```
#summary(krv18d$a)
```

```
krv12$b <- (SBA+ANCS)/2
```

```
summary(krv12$b)
```

```
krv12$c <- ((2*DPT3)+MSL+BCG)/4
```

```
summary(krv12$c)
```

```
krv12$d <- (ORT+CPNM)/2
```

```
summary(krv12$d)
```

```
krv12$icc <- 0.25*(krv12$FPS+krv12$b+krv12$c+krv12$d)
```

```

krv12$icc100 <- (krv12$icc)*100
str(krv12)
summary(krv12$icc100)
#####Filtering for diarrhea and cough
krv12n <- filter(krv12,krv12$ORT==1&krv12$CPNM==1)
#####For either diarrhea or cough
krv12n1 <- filter(krv12,krv12$ORT==1|krv12$CPNM==1)
#####cleaning dataframes
diao <- krv12n1[-c(1,14:15,17,25,32:44,38:44,55:57)]

#####Recoding before weighting
#####Will for pregnancy
levels(diao$V225)
levels(diao$V225) <- c("no","no","yes")
table(diao$V225)

summary(diao$M13)
diao$M13 <- cut(diao$M13,breaks = c(0,3,6,9),include.lowest = TRUE,labels = c("first-trim","second-
trim","third-trim"))
table(diao$M13)
summary(diao$M14)
diao$M14 <- cut(diao$M14,breaks = c(0,3,20),include.lowest =
TRUE,labels=c("less.than.4ANC","at.least.4ANC"))
table(diao$M14)

diao[c(29:36)] <- lapply(diao[c(29:36)],factor)

levels(diao$ORT)
levels(diao$ORT) <- c("no","yes")
levels(diao$CPNM) <-c("no","yes")
levels(diao$ANCS) <- c("no","yes")

```



```

levels(diao$FPS) <- c("no","yes")
levels(diao$DPT3)<- c("no","yes")
levels(diao$SBA)<- c("no","yes")
levels(diao$BCG)<- c("no","yes")
levels(diao$MSL)<- c("no","yes")
diao$V007 <- factor(diao$V007)
diao$icc <- cut(diao$icc,breaks = c(0,0.49,1),include.lowest = TRUE)
table(diao$icc)
levels(diao$icc) <- c("<50", ">=50")
levels(diao$icc) <- c("partial", "optimal")

#diao$icc <- relevel(diao$icc,ref = ">=50" )
diao$V190 <- relevel(diao$V190,ref = "Richest")

library(questionr)
diao <- rename.variable(diao, "icc", "cci")
diao <- rename.variable(diao, "V190", "Wealth.quintiles")
diao <- rename.variable(diao, "M14", "Antenatal.care")
diao <- rename.variable(diao, "M13", "Antenatal.period")

##### complexe design
#####Descriptive statistics with weighting

library(dplyr)
library(survey)
library(party)
library(gtsummary)
library(car)
library(ggplot2)
library(GGally)
library(forestmodel)

```

```

library(Epi)
library(ggeffects)
library(ggparty)
library(intsvy)
#####Variable Weighting
#Wt <- krV18$V005/1000000
#krV18 <- cbind(krV18,Wt)

Wt <- diao$V005/1000000
krV12 <- cbind(diao,Wt)

##### echantillon Complexe
dw1 <- svydesign(ids=~V021,data = krV12 ,strata=~V022+V024, weights=~Wt,nest = TRUE)

#####Descriptive summary
tab2012 <- tbl_svysummary(dw1)
tab2012

#####Excluding some variables before univariate analysis
diao1 <- diao[-c(1,3,6:7,11,26,29:36)]
names(diao1) <- c("V005", "V021", "V022", "V130", "V131", "V190", "V502", "V012",
                "V136", "V149", "V151", "V152", "V157", "V158", "V159", "V218",
                "V225", "V701", "V714", "B4", "M13", "M14", "cci", "icc100")
Wt <- diao1$V005/1000000
krV12 <- cbind(diao1,Wt)

##### echantillon Complexe
dw1 <- svydesign(ids=~V021,data = krV12 ,strata=~V022, weights=~Wt,nest = TRUE)

#####"

```

```

##b) 2012
tab2012 <- tbl_svysummary(dw1,by="cci")
tab2012 <- add_p(tab2012)

tab1 <- add_p(tab2012,
  test = list(
    all_continuous() ~ "svy.t.test",
    all_categorical() ~ "svy.wald.test"
  )
)
tab1

#####Mergin 2012 and 2018
tbl_merge(tbls = list(tab2012, tab2018)) %>%
  modify_spanning_header(everything() ~ NA_character_)

#####Only use for mapping purpose
diao1 <- diao[-c(1,3,6:7,11,26,29:36)]
names(diao1) <- c("V001", "V005", "V021", "V022", "V130", "V131", "V190", "V502", "V012",
  "V136", "V149", "V151", "V152", "V157", "V158", "V159", "V218",
  "V225", "V701", "V714", "B4", "M13", "M14", "cci", "icc100")
diao1 <- factor(diao1$V001)
tab2012 <- tbl_svysummary(dw1,by="cci",statistic = all_categorical()~"{p}%",percent = "row")

#####Multivariate analysis
#####For 2012
dput(names(diao))
tab6 <- svyglm(cci~B4+V190+V502+V136+V151+V149+V152+V157+V158+V218+

```

```

V225+V701+V714+M13+M14,dw1,family = quasibinomial()
)
#####Second models after taking into account collinearity
tab6 <- svyglm(icc~B4+V190+V502+V136+V151+V149+V152+V157+V158+V218+
V225+V701+V714+M13+M14,dw1,family = quasibinomial()
)
#####Step AIC for choosing best model
tab7 <- step(tab6)

#####Graphical representation of the model
ggcoef_model(tab7, exponentiate = TRUE)
forest_model(tab7)
#####Variables effects for 2012/predicted values
ggeffect(tab7,"V149")
ggeffect(tab7,"V152")
ggeffect(tab7, "V190")

#####Confusion matrix/ Quality of the model/2012
icc <- predict(tab7, type = "response", newdata =dw1[["variables"]])
head(cci)
table(cci > 0.5, diao$icc)
#####misclassification of the model
misclas <- (352+535)/3005#####29% of misclassification

#####Model Evaluation
##### ROC curve
ROC(form=cci ~ B4 + V190 + V151 + V149 + V152 +V158+ V225 + V701 +
M13 + M14,plot="ROC",data = dw1[["variables"]])
#ROC(form=icc ~B4 + V190 + V151 + V149 + V152 + V225 + V701 +

```

```

# V714 + M13 + M14,plot="ROC",data = dw1[["variables"]])
#####coefficients significance
anova(tab7, test = "Chisq")
#####model assessment
with(tab7,pchisq(null.deviance-deviance,df.null-df.residual,lower.tail = F))

#####multicollinearity
vif(tab7)#####no collinearity
#####Merging univariate and multivariate analysis
#####
tab7 <- tab7 %>%
  tbl_regression(exponentiate = TRUE) %>%
  add_global_p(type = "II")
tab7
#####Using gtsummary
tab7 <- tbl_regression(tab7,exponentiate = TRUE)

##### Find why second-time women used more malprev measure than 1st
tab1 <- prop.table(table(dhs$times.1ANC,dhs$w.quitile),2)
#####Merging Multivariate data
tbl_merge(tbls = list(tab7, tab9)) %>%
  modify_spanning_header(everything() ~ NA_character_)
#####Testing interactions
#a) dhs 2012 models interactions
library(glmulti)
diao2012 <- dw1[["variables"]]
tab77 <- glmulti(cci ~ B4 + V190 + V502 + V151 + V149 + V152 + V157 + V158 + V218 +
  V225 + V714 + M13,data = diao,family=binomial())

#a) Models interaction outputs

```

```
tab77 <-svyglm(cci~1+B4+V190+V151+V149+V152+V151:B4+V149:V151+V152:B4,dw1,family =
quasibinomial())
```

```
ROC(form=icc~1+B4+V190+V151+V149+V152+V151:B4+V149:V151+V152:B4,
plot="ROC",data = diao2012)
```

```
ggcoef_model(tab77, exponentiate = TRUE)
```

```
forest_model(tab77)
```

```
#####Confusion matrix/ Quality of the model/2012
```

```
malprev <- predict(tab77, type = "response", newdata =dw1[["variables"]])
```

```
head(malprev)
```

```
table(malprev > 0.5, dhs2012$malprev)
```

```
#####misclassification of the model
```

```
misclas <- (64+199)/781#####33% of misclassification
```

```
#####we opt for our first model because the new one perform not much
```

```
#####b) dhs 2018 models interactions
```

```
diao <- dw1[["variables"]]
```

```
tab78 <- glmulti(cci ~ B4 + V190 + V151 + V149 + V152 + V157 + V218 + V225 + V701 +
M13 + M14,data = dhs2018,family=binomial())
```

```
#a) Models interaction outputs
```

```
tab78 <-
```

```
svyglm(malprev~1+h.number+a.newspap+a.radio+currently.w+place.deliver+sexheadhouse+a.radio:h.number+a.radio:a.newspap+currently.w:h.number
```

```
+currently.w:a.radio+place.deliver:h.number,dw2,family = quasibinomial()
```

```
)
```

```
diabetes_results %>%
```

```
roc_curve(truth = diabetes, .pred_pos) %>%
```

```
autoplot()
```

```

ROC(form=malprev~1+h.number+a.newspap+a.radio+currently.w+place.deliver+sexheadhouse+a.radio:h
.number+a.radio:a.newspap+currently.w:h.number
+currently.w:a.radio+place.deliver:h.number,
plot="ROC",data = dhs2018)
#####Confusion matrix/ Quality of the model/2018
malprev <- predict(tab78, type = "response", newdata =dw2[["variables"]])
head(malprev)
table(malprev > 0.5, dhs2018$malprev)
#####End_Regression
#####misclassification of the model
misclas <- (6+431)/2123#####33% of misclassification

#####we opt for our first model because the new one perform not much

#Start#####Using CART on multivariable result
#A) For 2012
tab10 <- ctree(cci ~ Wealth.quintiles + V701 +
Antenatal.period + Antenatal.care,data = dw1[["variables"]])

nid <- nodeids(tab10)
iid <- nid[!(nid %in% nodeids(tab10, terminal = TRUE))]
(pval <- unlist(nodeapply(tab10, ids = iid,
FUN = function(n) info_node(n)$p.value)))

myttnc2 <- nodeprune(tab10, ids = iid[pval > 1e-5])

plot(myttnc2)

```

```

tab10 <- as.constparty(myttnc2)

#####Using###ggtree

ggparty(myttnc2) +
  geom_edge() +
  geom_edge_label() +
  geom_node_splitvar() +
  geom_node_plot(gglist = list(geom_bar(aes(x = "", fill = cci),
                                position = position_fill()),
                                xlab("")),
                # draw only one label for each axis
                shared_axis_labels = TRUE,
                # draw line between tree and legend
                legend_separator = TRUE
  )

#####End Diaio script

library(foreign)
kr18<- read.spss("D:\\MOOC\\GNKR71FL.sav",to.data.frame = TRUE)
kr18 <- subset(kr18, select = c("V001", "V005", "V007", "V012", "V013", "V021",
                              "V022","V023", "V024", "V025", "V026", "V130", "V131", "V136", "V149",
                              "V151",
                              "V152", "V157", "V158", "V159", "V190","V191", "V218", "V225", "V501",
                              "V502", "V701",
                              "V714", "V626", "V313",
                              "B4","B5","B8","MIDX","H1","H2","H3","H5","H7","H9","H10","H11","H13","H14",
                              "H31","H32A","H32B","H32C","H32E","H32I","H32J","H32K","H32L", "H32N",
                              "H32S","H32Y",

```



```
"M2A","M2B","M2C","M3A","M3B","M3C", "M13", "M14"))
```

```
#Filtrer les enfants vivants
```

```
library(nlme)
```

```
library(dplyr)
```

```
#####Filtering on living child
```

```
krv18 <- filter(kr18,kr18$B5=="Yes")
```

```
#####Filtering by age more than a year
```

```
krv18 <- filter(kr18,kr18$B8>=1)
```

```
#####checking for missing values
```

```
sapply(krv18, function(x) sum(is.na(x)))
```

```
#####Recoding variables before imputation
```

```
summary(krv18$V012)
```

```
table(krv18$V012)
```

```
##Recoding for living child and household number
```

```
summary(krv18$`V218`)
```

```
table(krv18$`V218`)
```

```
summary(krv18$`V136`)
```

```
table(krv18$`V136`)
```

```
str(krv18)
```

```
summary(krv18)
```

```
sapply(krv18, function(x) sum(is.na(x)))
```

```
#####Reducing data sets
```

```
#####recoding some variables
```

```
levels(krv18$H2)
table(krv18$H2)
levels(krv18$H2) <- c("No", "Yes", "Yes", "Yes", "No")
levels(krv18$H2)
table(krv18$H2)
```

```
levels(krv18$H3)
table(krv18$H3)
levels(krv18$H3) <- c("No", "Yes", "Yes", "Yes", "No")
levels(krv18$H3)
```

```
levels(krv18$H5)
table(krv18$H5)
levels(krv18$H5) <- c("No", "Yes", "Yes", "Yes", "No")
levels(krv18$H5)
table(krv18$H5)
```

```
levels(krv18$H7)
table(krv18$H7)
levels(krv18$H7) <- c("No", "Yes", "Yes", "Yes", "No")
levels(krv18$H7)
table(krv18$H7)
```

```
levels(krv18$H9)
table(krv18$H9)
levels(krv18$H9) <- c("No", "Yes", "Yes", "Yes", "No")
levels(krv18$H9)
table(krv18$H9)
```

```
levels(krv18$H10)
table(krv18$H10)
levels(krv18$H10) <- c("No", "Yes", "No")
table(krv18$H10)
```

```
levels(krv18$H11)
table(krv18$H11)
levels(krv18$H11) <- c("No", "Yes", "Yes", "No")
table(krv18$H11)
```

```
levels(krv18$H13)
table(krv18$H13)
levels(krv18$H13) <- c("No", "Yes", "Yes", "No")
table(krv18$H13)
```

```
levels(krv18$H14)
table(krv18$H14)
levels(krv18$H14) <- c("No", "Yes", "Yes", "No")
table(krv18$H14)
```

```
levels(krv18$H31)
levels(krv18$H31) <- c("No", "Yes", "Yes", "No")
table(krv18$H31)
```

```
#####Information access
```

```
levels(krv18$V157)
levels(krv18$V157) <- c("noaccess", "access", "access", "access")
table(krv18$V157)
```

```
levels(krv18$V158)
levels(krv18$V158) <- c("noaccess", "access", "access", "access")
table(krv18$V158)
```

```
levels(krv18$V159)
levels(krv18$V159) <- c("noaccess", "access", "access", "access")
table(krv18$V159)
```

```
levels(krv18$V502)
table(krv18$V502)
levels(krv18$V502) <- c("single", "married", "single")
table(krv18$V502)
```

```
levels(krv18$V149)
levels(krv18$V149) <- c("noeducation", "primary", "primary", "secondary",
                        "secondary", "higher")
table(krv18$V149)
```

```
#####partner education
```

```
levels(krv18$V701)
levels(krv18$V701) <- c("noeducation", "primary", "secondary", "higher", "noeducation")
table(krv18$V701)
```

```
levels(krv18$`V152`)
levels(krv18$`V152`) <- c("16", "17", "18", "19", "20", "21", "22", "23", "24", "25", "26", "27",
                        "28", "29", "30", "31", "32", "33", "34", "35", "36", "37", "38", "39",
                        "40", "41", "42", "43", "44", "45", "46", "47", "48", "49", "50", "51",
                        "52", "53", "54", "55", "56", "57", "58", "59", "60", "61", "62", "63",
                        "64", "65", "66", "67", "68", "69", "70", "71", "72", "73", "74", "75",
                        "76", "77", "78", "79", "80", "81", "82", "83", "84", "85", "86", "87",
```

```
"88","89","90","95","97","97")
```

```
krv18$`V152` <- as.numeric(levels(krv18$`V152`))[krv18$`V152`]
```

```
table(krv18$`V152`)
```

```
summary(krv18$`V152`)
```

```
table(krv18$`V152`)
```

```
#####anc
```

```
table(krv18$`M14`)
```

```
levels(krv18$`M14`)
```

```
levels(krv18$`M14`) <-
```

```
c("0","1","10","11","12","13","14","15","16","2","20","3","4","5","6","7","8","9","0")
```

```
table(krv18$`M14`)
```

```
krv18$`M14` <- as.numeric(levels(krv18$`M14`)[krv18$`M14`])
```

```
table(krv18$`M14`)
```

```
#####
```

```
summary(krv18$`M14`)
```

```
#krv12$`M14` <- cut(krv12$`M14`,breaks = c(0,1,3,9),include.lowest = TRUE)
```

```
table(krv12$`M14`)
```

```
#####time first anc
```

```
levels(krv18$`M13`)
```

```
table(krv18$`M13`)
```

```
levels(krv18$`M13`) <- c("0","1","10","2","3","4","5","6","7","8","9","0")
```

```
table(krv18$`M13`)
```

```
krv18$`M13` <- as.numeric(levels(krv18$`M13`)[krv18$`M13`])
```

```
table(krv18$`M13`)
```

```
summary(krv18$`M13`)
```

```
#krv18$`M13` <- cut(krv18$`M13`,breaks = c(1,3,6,9),include.lowest = TRUE, labels = c("first-trim","second-trim","third-trim"))
```

```
table(krv18$`M13`)
```

```
#ORT#####For diarrhea
```

```
krv18$ORT[krv18$H11=="Yes" & krv18$H13=="No" &krv18$H14=="No"] <- "0"
```

```
krv18$ORT[krv18$H11=="Yes" & krv18$H13=="Yes" |krv18$H14=="Yes"] <- "1"
```

```
levels(krv18$ORT)
```

```
krv18$ORT <- factor(krv18$ORT)
```

```
table(krv18$ORT)
```

```
krv18$ORT <- factor((krv18$ORT),levels = c("0","1"))
```

```
krv18$ORT<-as.numeric(levels(krv18$ORT)[krv18$ORT])
```

```
table(krv18$ORT)
```

```
#####CPNM is care seeking for pneumonia
```

```
krv18$CPNM[krv18$H31=="Yes" &
```

```
  krv18$H32A=="No" &
```

```
  krv18$H32B=="No" &
```

```
  krv18$H32C=="No" &
```

```
  krv18$H32E=="No" &
```

```
  krv18$H32J=="No" &
```

```
  krv18$H32L=="No" &
```

```
  krv18$H32N=="No" &
```

```
  krv18$H32S=="No" ] <-
```

```
"0"
```

```
krv18$CPNM[krv18$H31=="Yes" &
```

```
  krv18$H32A=="Yes" |
```

```
  krv18$H32B=="Yes" |
```

```
  krv18$H32C=="Yes" |
```

```
  krv18$H32E=="Yes" |
```

```
  krv18$H32J=="Yes" |
```

```

krv18$H32L=="Yes" |
krv18$H32N=="Yes" |
krv18$H32S=="Yes" ] <-
"1"
krv18$CPNM <- factor(krv18$CPNM)
sapply(krv18, function(x) sum(is.na(x)))

#####Removing uninteresting variables for imputation
krv12d <- krv18[-c(1:3,5,7:13,22,25:26,29:30,32,34:35,42:55)]
krv12d1 <- krv18[c(1:3,6:7,9:10,12:13,21:22,26,29,34)]
#####Vaccination status
library(mice)
init = mice(krv12d, maxit=0)
#init = mice(krv18d, maxit=20)

meth1 = init$method
#meth1[which(meth1=="pmm")]<-"norm.boot"
#meth1[which(meth1=="logreg")]<-"logreg.boot"

meth1
predM = init$predictorMatrix
#predM[, c("V001")] <- 0
#predM[, c("V005")] <- 0
#predM[, c("V191")] <- 0
krv12d = mice(krv12d,pred=predM,seed = 15422,m = 5)
#krv18d = mice(krv18d,pred=predM,seed = 15422,m = 10)
#impl=mice(krv18d,print=FALSE)
#####Inspect the convergence of the algorithm
plot(krv12d,layout = c(4,4))#####based on fig we need more iterations
#####Inspect diagnostics

```

```

densityplot(krv12d)
densityplot(krv12d, ~ CPNM+M13+M14,
            layout = c(3,2))
bwplot(krv12d)
krv12d <- complete(krv12d)
#####saving workspace
#save.image(file =("D:\\MOOC\\diao1.RData"))
#####Loading workspace
#load("D:\\MOOC\\diao1.RData")
str(krv12d)
sapply(krv12d, function(x) sum(is.na(x)))
summary(krv12d)
#####Merging dataframes
diaoc <- cbind(krv12d1,krv12d)
sapply(diaoc, function(x) sum(is.na(x)))

#####Following code not check!!!!!!!!!!!!!!
#write.csv2(diaoc,file = "D:\\MOOC\\diaod18.csv")

krv18 <- read.csv2("D:\\MOOC\\diaod18.csv", header = T,
                 stringsAsFactors=TRUE)
library(dplyr)
#####Including missing variables
#krv18 <- cbind(krv18,krv18d1[c(13)])
str(krv18)
summary(krv18)
sapply(krv18, function(x) sum(is.na(x)))

#####religion
library(na.tools)

```



```
levels(krv18$V130)
levels(krv18$V130) <- c("noreligion","Christian","muslim","noreligion")
krv18$V130 <- na.bootstrap(krv18$V130)
table(krv18$V130)
```

```
levels(krv18$V131)
levels(krv18$V131) <- c("guerzé","kissi","malinké","other","peulh","soussou","toma")
table(krv18$V131)
```

```
#####Antenatal care
krv18$ANCS[krv18$M2A=="No" &krv18$M2B=="No" & krv18$M2C=="No"] <- "0"
krv18$ANCS[krv18$M2A=="Yes" | krv18$M2B=="Yes" | krv18$M2C=="Yes"] <- "1"
table(krv18$ANCS)
```

```
table(krv18$ANCS)
levels(krv18$ANCS)
krv18$ANCS <- factor(krv18$ANCS)
krv18$ANCS <- factor((krv18$ANCS),levels = c("0","1"))
krv18$ANCS<-as.numeric(levels(krv18$ANCS)[krv18$ANCS])
table(krv18$ANCS)
```

```
#####Delivery/
krv18$SBA[krv18$M3A=="No" & krv18$M3B=="No" & krv18$M3C=="No"] <- "0"
krv18$SBA[krv18$M3A=="Yes" | krv18$M3B=="Yes" | krv18$M3C=="Yes"] <- "1"
table(krv18$SBA)
krv18$SBA <- factor(krv18$SBA)
levels(krv18$SBA)
krv18$SBA <- factor((krv18$SBA),levels = c("0","1"))
krv18$SBA<-as.numeric(levels(krv18$SBA)[krv18$SBA])
krv18$SBA<-as.numeric(krv18$SBA)
```

```
table(krv18$SBA)
```

```
summary(krv18$V012)
```

```
krv18$V012 <- cut(krv18$V012,breaks = c(15,18,30,40,49),include.lowest = TRUE)
```

```
summary(krv18$V218)
```

```
krv18$V218 <- cut(krv18$V218,breaks = c(1,2,4,7,13),include.lowest = TRUE)
```

```
summary(krv18$V136)
```

```
krv18$V136 <- cut(krv18$V136,breaks = c(1,5,10,38),include.lowest = TRUE)
```

```
summary(krv18$V152)
```

```
krv18$V152<- cut(krv18$V152,breaks = c(16,25,40,60,97),include.lowest = TRUE)
```

```
library(forcats)
```

```
levels(krv18$V626)
```

```
krv18$V626 <- fct_recode(krv18$V626,
```

```
  NULL = "Never had sex",
```

```
  "No" = "Unmet need for spacing",
```

```
  "No" = "Unmet need for limiting",
```

```
  "Yes" = "Using for spacing",
```

```
  "Yes" = "Using for limiting",
```

```
  NULL = "Spacing failure",
```

```
  NULL = "Limiting failure",
```

```
  NULL = "No unmet need",
```

```
  NULL = "Not married and no sex in last 30 days",
```

```
  NULL = "Infecund, menopausal")
```

```
krv18$V626 <- na.replace(krv18$V626,.na = "No")
```

```
levels(krv18$V626)
```

```
table(krv18$V626)
```

```
#####Family
```

```
#krv18$FPS <- NA
```

```
krv18$FPS[krv18$V626=="No"] <- "0"  
krv18$FPS[krv18$V626=="Yes"] <- "1"
```

```
levels(krv18$FPS)  
krv18$FPS <- factor(krv18$FPS)  
table(krv18$FPS)  
krv18$FPS <- factor((krv18$FPS),levels = c("0","1"))  
krv18$FPS<-as.numeric(levels(krv18$FPS)[krv18$FPS])  
table(krv18$FPS)
```

```
#Trois doses DTP  
#krv18$DPT3 <- NA  
krv18$DPT3[krv18$H3=="No" |krv18$H5=="No" |krv18$H7=="No"] <- "0"  
krv18$DPT3[krv18$H3=="Yes" &krv18$H5=="Yes" & krv18$H7=="Yes"] <- "1"  
levels(krv18$DPT3)  
krv18$DPT3 <- factor(krv18$DPT3)  
table(krv18$DPT3)  
krv18$DPT3 <- factor((krv18$DPT3),levels = c("0","1"))  
krv18$DPT3<-as.numeric(levels(krv18$DPT3)[krv18$DPT3])  
table(krv18$DPT3)
```

```
#Rougole  
#krv18$MSL <- NA  
krv18$MSL[krv18$H9=="No"] <- "0"  
krv18$MSL[krv18$H9=="Yes"] <- "1"
```

```
levels(krv18$MSL)  
krv18$MSL <- factor(krv18$MSL)  
table(krv18$MSL)  
krv18$MSL <- factor((krv18$MSL),levels = c("0","1"))
```

```
krv18$MSL<-as.numeric(levels(krv18$MSL)[krv18$MSL])
table(krv18$MSL)
```

```
#BCG
```

```
#krv18dddd$BCG <- krv18dddd$H2
```

```
#krv18dddd$BCG <- NA
```

```
krv18$BCG[krv18$H2=="No"] <- "0"
```

```
krv18$BCG[krv18$H2=="Yes"] <- "1"
```

```
table(krv18$BCG)
```

```
levels(krv18$BCG)
```

```
krv18$BCG <- factor(krv18$BCG)
```

```
table(krv18$BCG)
```

```
krv18$BCG <- factor((krv18$BCG),levels = c("0","1"))
```

```
krv18$BCG<-as.numeric(levels(krv18$BCG)[krv18$BCG])
```

```
table(krv18$BCG)
```

```
#####Last filtering with family planning
```

```
krv18d1<- filter(krv18,krv18$FPS==0)
```

```
krv18d2<- filter(krv18,krv18$FPS==1)
```

```
#####Merging the two dataframes
```

```
krv18 <- rbind(krv18d1,krv18d2)
```

```
###ICC
```

```
attach(krv18)
```

```
#detach(krv18d)
```

```
#krv18d$a <- FPS
```

```

#summary(krv18d$a)
krv18$b <- (SBA+ANCS)/2
summary(krv18$b)
krv18$c <- ((2*DPT3)+MSL+BCG)/4
summary(krv18$c)
krv18$d <- (ORT+CPNM)/2
summary(krv18$d)

krv18$icc <- 0.25*(krv18$FPS+krv18$b+krv18$c+krv18$d)
krv18$icc100 <- (krv18$icc)*100
str(krv18)
summary(krv18$icc100)
#####Filtering for diarrhea and cough
krv18n <- filter(krv18,krv18$ORT==1&krv18$CPNM==1)
#####For either diarrhea or cough
krv18n1 <- filter(krv18,krv18$ORT==1|krv18$CPNM==1)
#####cleaning dataframes
diao18 <- krv18n1[-c(1,12,14:15,17,32:44,38:44,55:57)]

#####Recoding before weighting
#####Will for pregnancy
levels(diao18$V225)
levels(diao18$V225) <- c("no","no","yes")
table(diao18$V225)

summary(diao18$M13)
diao18$M13 <- cut(diao18$M13,breaks = c(0,3,6,10),include.lowest = TRUE,labels = c("first-
trim","second-trim","third-trim"))
table(diao18$M13)
summary(diao18$M14)

```

```
diao18$M14 <- cut(diao18$M14,breaks = c(0,3,20),include.lowest =
TRUE,labels=c("less.than.4ANC", "at.least.4ANC"))
```

```
table(diao18$M14)
```

```
diao18[c(29:36)] <- lapply(diao18[c(29:36)],factor)
```

```
levels(diao18$ORT)
```

```
levels(diao18$ORT) <- c("no","yes")
```

```
levels(diao18$CPNM) <-c("no","yes")
```

```
levels(diao18$ANCS) <- c("no","yes")
```

```
levels(diao18$FPS) <- c("no","yes")
```

```
levels(diao18$DPT3)<- c("no","yes")
```

```
levels(diao18$SBA)<- c("no","yes")
```

```
levels(diao18$BCG)<- c("no","yes")
```

```
levels(diao18$MSL)<- c("no","yes")
```

```
diao18$V007 <- factor(diao18$V007)
```

```
diao18$icc <- cut(diao18$icc,breaks = c(0,0.49,1),include.lowest = TRUE)
```

```
table(diao18$icc)
```

```
levels(diao18$icc) <- c("<50", ">=50")
```

```
diao18$icc <- relevel(diao18$icc,ref = "<50" )
```

```
#diao18$icc <- relevel(diao18$icc,ref = ">=50" )
```

```
diao18$V190 <- relevel(diao18$V190,ref = "Richest")
```

```
library(questionr)
```

```
diao18 <- rename.variable(diao18,"icc","cci")
```

```
#####
```

```
diao18 <- rename.variable(diao18,"V190","Wealth.quintiles")
```

```
diao18 <- rename.variable(diao18,"M14","Antenatal.care")
```

```

diao18 <- rename.variable(diao18,"V714","currently.working")
diao18 <- rename.variable(diao18,"V158","Radio")

##### complexe design
#####Descriptive statistics with weighting
library(dplyr)
library(survey)
library(party)
library(gtsummary)
library(car)
library(ggplot2)
library(GGally)
library(forestmodel)
library(Epi)
library(ggeffects)
library(ggparty)
library(intsvy)
library(questionr)

#####Variable Weighting
#Wt <- kr18$V005/1000000
#kr18 <- cbind(kr18,Wt)
diao18 <- rename.variable(diao18,"Wealth.quintiles","V190")
diao18 <- rename.variable(diao18,"Radio","V158")
diao18 <- rename.variable(diao18,"Antenatal.care","M14")

Wt <- diao18$V005/1000000
kr12 <- cbind(diao18,Wt)

##### echantillon Complexe
dw1 <- svydesign(ids=~V021,data = kr12 ,strata=~V022, weights=~Wt,nest = TRUE)

```

```

#####Descriptive summary
tab2018 <- tbl_svysummary(dw1)
tab2018
tab2018 <- tbl_svysummary(dw1,by="cci")
tab2018 <- add_p(tab2018)

#####Merging
tbl_merge(tbls = list(tab2012, tab2018)) %>%
  modify_spanning_header(everything() ~ NA_character_)

#####Excluding some variables before univariate analysis
diao181 <- diao18[-c(1,3,6:9,20,26,29:36)]
#names(diao181) <- c("V005", "V021", "V022", "V130", "V131", "V190", "V502", "V012",
#      "V136", "V149", "V151", "V152", "V157", "V158", "V159", "V218",
#      "V225", "V701", "V714", "B4", "M13", "M14", "cci", "icc100")
Wt <- diao181$V005/1000000
krv12 <- cbind(diao181,Wt)

##### echantillon Complexe
dw2 <- svydesign(ids=~V021,data = krv12 ,strata=~V022, weights=~Wt,nest = TRUE)

##b) 2012
tab2018 <- tbl_svysummary(dw2,by="cci")
tab2018

tab2 <- add_p(tab2018,
  test = list(
    all_continuous() ~ "svy.t.test",
    all_categorical() ~ "svy.wald.test"
  )
)

```



)

tab2018

#####Mergin 2012 and 2018

tbl\_merge(tbls = list(tab1, tab2)) %>%

  modify\_spanning\_header(everything() ~ NA\_character\_)

#####Only use for mapping purpose

diao18 <- diao18[-c(3,6:7,11,26,29:36)]

names(diao18) <- c("V005", "V021", "V022", "V130", "V131", "V190", "V502", "V012",  
  "V136", "V149", "V151", "V152", "V157", "V158", "V159", "V218",  
  "V225", "V701", "V714", "B4", "M13", "M14", "cci", "icc100")

diao1 <- factor(diao1\$V001)

#####Multivariate analysis

#####For 2018

dput(names(diao181))

tab6 <- svyglm(cci~B4+V190+V502+V136+V151+V149+V152+V136+V157+V158+V159+V218+  
  V225+V701+currently.working+M13+M14,dw2,family = quasibinomial()

)

#####Second models after taking into account collinearity

#tab6 <- svyglm(icc~B4+V190+V502+V136+V151+V149+V152+V157+V158+V218+

#  V225+V701+V714+M13+M14,dw1,family = quasibinomial()

#)

#####Step AIC for choosing best model

tab8 <- step(tab6)

#####Graphical representation of the model

ggcoef\_model(tab7, exponentiate = TRUE)

forest\_model(tab7)

```

#####Variables effects for 2012/predicted values
ggeffect(tab7,"V149")
ggeffect(tab7,"V152")
ggeffect(tab7, "V190")

#####Confusion matrix/ Quality of the model/2012
icc <- predict(tab7, type = "response", newdata =dw1[["variables"]] )
head(cci)
table(cci > 0.5, diao18$icc)
#####misclassification of the model
misclas <- (352+535)/3005#####29% of misclassification

#####Model Evaluation
##### ROC curve
ROC(form=cci ~ B4 + V190 + V151 + V149 + V152 +V158+ V225 + V701 +
      M13 + M14,plot="ROC",data = dw1[["variables"]])
#ROC(form=icc ~B4 + V190 + V151 + V149 + V152 + V225 + V701 +
#♣ V714 + M13 + M14,plot="ROC",data = dw1[["variables"]])
#####coefficients significance
anova(tab7, test = "Chisq")
#####model assessment
with(tab7,pchisq(null.deviance-deviance,df.null-df.residual,lower.tail = F))

#####mulitcollinearity
vif(tab7)#####no collinearity
#####Merging univariate and multivariate analysis
#####
tab7 <- tab7 %>%
tbl_regression(exponentiate = TRUE) %>%

```

```

add_global_p(type = "II")

tab7
#####Using gtsummary
tab8 <- tbl_regression(tab8,exponentiate = TRUE)

##### Find why second-time women used more malprev measure than 1st
tab1 <- prop.table(table(dhs$times.1ANC,dhs$w.quitile),2)
#####Merging Multivariate data
tbl_merge(tbls = list(tab7, tab8)) %>%
  modify_spanning_header(everything() ~ NA_character_)
#####Testing interactions
#a) dhs 2012 models interactions
library(glmulti)
diao18 <- dw1[["variables"]]
tab77 <- glmulti(cci ~ B4 + V190 + V502 + V151 + V149 + V152 + V157 + V158 + V218 +
  V225 + V714 + M13,data = diao18,family=binomial())

#a) Models interaction outputs
tab77 <-svyglm(cci~1+B4+V190+V151+V149+V152+V151:B4+V149:V151+V152:B4,dw1,family =
quasibinomial())

ROC(form=icc~1+B4+V190+V151+V149+V152+V151:B4+V149:V151+V152:B4,
  plot="ROC",data = diao182012)
ggcoef_model(tab77, exponentiate = TRUE)
forest_model(tab77)
#####Confusion matrix/ Quality of the model/2012
malprev <- predict(tab77, type = "response", newdata =dw1[["variables"]] )
head(malprev)
table(malprev > 0.5, dhs2012$malprev)
#####misclassification of the model

```

```
misclas <- (64+199)/781#####33% of misclassification
```

```
#####we opt for our first model because the new one perform not much
```

```
#####b) dhs 2018 models interactions
```

```
diao18 <- dw1[["variables"]]
```

```
tab78 <- glmulti(cci ~ V190 + V151 + V149 + V152 + V157 + V218 + V225 + V701 +  
M13,data = dhs2018,family=binomial())
```

```
#a) Models interaction outputs
```

```
tab78 <-
```

```
svyglm(malprev~1+h.number+a.newspap+a.radio+currently.w+place.deliver+sexheadhouse+a.radio:h.number+a.radio:a.newspap+currently.w:h.number
```

```
+currently.w:a.radio+place.deliver:h.number,dw2,family = quasibinomial()
```

```
)
```

```
diabetes_results %>%
```

```
roc_curve(truth = diabetes, .pred_pos) %>%
```

```
autoplot()
```

```
ROC(form=malprev~1+h.number+a.newspap+a.radio+currently.w+place.deliver+sexheadhouse+a.radio:h.number+a.radio:a.newspap+currently.w:h.number
```

```
+currently.w:a.radio+place.deliver:h.number,
```

```
plot="ROC",data = dhs2018)
```

```
#####Confusion matrix/ Quality of the model/2018
```

```
malprev <- predict(tab78, type = "response", newdata =dw2[["variables"]])
```

```
head(malprev)
```

```
table(malprev > 0.5, dhs2018$malprev)
```

```
#####End_Regression
```

```
#####misclassification of the model
```

```
misclas <- (6+431)/2123#####33% of misclassification
```

```
#####we opt for our first model because the new one perform not much
```

```
#Start#####Using CART on multivariable result
```

```
#A) For 2012
```

```
tab10 <- ctree(cci~Wealth.quintiles +V151+V152+V157+V158+V159+V225+currently.working  
              +M13+Antenatal.care,data = dw2[["variables"]])
```

```
nid <- nodeids(tab10)
```

```
iid <- nid[!(nid %in% nodeids(tab10, terminal = TRUE))]
```

```
(pval <- unlist(nodeapply(tab10, ids = iid,  
                          FUN = function(n) info_node(n)$p.value)))
```

```
myttnc2 <- nodeprune(tab10, ids = iid[pval > 1e-5])
```

```
plot(myttnc2)
```

```
tab10 <- as.constparty(myttnc2)
```

```
#####Using###ggtree
```

```
ggparty(tab10) +  
  geom_edge() +  
  geom_edge_label() +  
  geom_node_splitvar() +  
  geom_node_plot(gglist = list(geom_bar(aes(x = "", fill = cci),  
                                     position = position_fill()),  
                        xlab("")),  
  # draw only one label for each axis  
  shared_axis_labels = TRUE,
```

```
# draw line between tree and legend
legend_separator = TRUE
)
```

---

---

```
#####Loading libraries
```

```
library(sf)
#library(sp)
library(dplyr)
library(ggplot2)
library(tmap)
library(rgeoda)
library(spdep)
```

```
#####For 2012
```

```
Guinea_12 <- st_read("D:\\MOOC\\shps_2012\\sdr_subnational_boundaries.shp",layer =
"sdr_subnational_boundaries")
cci12 <- read.csv2 ("D:\\MOOC\\tab12spat.csv")
cci12$cci_12 <- cci12$cci_12*100
cci12$region <- factor(cci12$region)
levels(cci12$region) <- c(
"Boké","Conakry","Faranah","Kankan","Kindia","Labé","Mamou","Nzérékoré")
```

```
#####merging
```

```
OA.Census_12 <- inner_join(Guinea_12, cci12, by = c("DHSREGFR" = "region"))
```

```
#####For 2018
```

```
Guinea_18 <- st_read("D:\\MOOC\\shps_2018\\sdr_subnational_boundaries.shp",layer =
"sdr_subnational_boundaries")
```

```

cci18 <- read.csv2 ("D:\\MOOC\\tab18spat.csv")
cci18$cci_18 <- cci18$cci_18*100
cci18$region <- factor(cci18$region)
levels(cci18$region) <- c(
"Boké","Conakry","Faranah","Kankan","Kindia","Labé","Mamou","N'Zérékoré")

#####merging
OA.Census_18 <- inner_join(Guinea_18, cci18, by = c("DHSREGFR" = "region"))

#####Making map for 2018
cci2012<- tm_shape(OA.Census_12) +
  tm_fill(col = "cci_12", title = "% of partial cci in 2012") +
  tm_compass(type = "arrow",position = "right") +
  tm_scale_bar(position = "center")+
  tm_text("DHSREGFR", size =0.80,col = "black")+
  tm_layout(bg.color = "skyblue", inner.margins = c(0, .02, .02, .02))+
  tm_add_legend(type = "symbol")+tm_borders(col = "white")+
  tm_xlab(text = "source= spatialdata.dhsprogram.com")
cci2012
#####For 2018
cci2018 <- tm_shape(OA.Census_18) +
  tm_fill(col = "cci_18", title = "% of Partial cci in 2018") +
  tm_compass(type = "arrow",position = "right") +
  tm_scale_bar(position = "center")+
  tm_text("DHSREGFR", size =0.80,col = "black")+
  tm_layout(bg.color = "skyblue", inner.margins = c(0, .02, .02, .02))+
  tm_add_legend(type = "symbol")+tm_borders(col = "white")+
  tm_xlab(text = "source= spatialdata.dhsprogram.com")
cci2018

```

```
tmap_arrange(cci2012,cci2018,nrow = 1)
```

```
#####Cluster analysis Moran
```

```
#####Working with rgeoda
```

```
#####3.1 Queen Contiguity Weights
```

```
queen_weights(sf_obj, order=1, include_lower_order = False, precision_threshold = 0)
```

```
queen_w_12 <- queen_weights(OA.Census_12)
```

```
queen_w_18 <- queen_weights(OA.Census_18)
```

```
summary(queen_w_12)
```

```
summary(queen_w_18)
```

```
#####Attributes of Weight object
```

```
is_symmetric(queen_w_12)
```

```
has_isolates(queen_w_18)
```

```
weights_sparsity(queen_w_12)
```

```
weights_sparsity(queen_w_18)
```

```
###To access the details of the weights:list the neighbors of a specified observation
```

```
nbrs <- get_neighbors(queen_w_12, idx = 1)
```

```
cat("\nNeighbors of the 1-st observation are:", nbrs)
```

```
#To compute the spatial lag of a specified observation by passing the values of the selected variable
```

```
lag12 <- spatial_lag(queen_w_12, OA.Census_12['cci_12'])
```

```
lag12
```

```
lag18 <- spatial_lag(queen_w_18, OA.Census_18['cci_18'])
```

```
lag18
```

```
#####3.2 Rook Contiguity Weights
```



```
### to create a Rook contiguity weights using the sf object guerry
```

```
rook_w <- rook_weights(OA.Census_12)
```

```
summary(rook_w)
```

```
#####The weights we created are in memory. To save the weights to a file, one can call the function
```

```
#save_weights(rook_w, OA.Census['ID_1'], out_path = 'D:\\MOOC\\OA.Census_r.gal',
```

```
#      layer_name = 'NAME_1')
```

```
#####3.3 Distance Based Weights
```

```
#min_distthreshold(GeoDa gda, bool is_arc = False, is_mile = True)
```

```
##To create a Distance based weights, one can call the function `distance_weights`
```

```
###Then, with this distance threshold, we can create a distance-band weights using the function
```

```
#distance_weights(geoda_obj, dist_thres, power=1.0, is_inverse=False, is_arc=False, is_mile=True)
```

```
dist_thres <- min_distthreshold(OA.Census_12)
```

```
dist_thres
```

```
#dist_w <- distance_weights(OA.Census_12, dist_thres)
```

```
#summary(dist_w)
```

```
#####3.4 K-Nearest Neighbor Weights
```

```
#knn_weights(gda, k, power = 1.0, is_inverse = False, is_arc = False, is_mile = True)
```

```
##to create a 6-nearest neighbor weights using Guerry
```

```
knn6_w <- knn_weights(OA.Census_12, 6)
```

```
summary(knn6_w)
```

```

##To create a kernel weights with fixed bandwidth
bandwidth <- min_distthreshold(OA.Census_12)
#kernel_w <- kernel_weights(OA.Census_12, bandwidth, kernel_method = "uniform")
#summary(kernel_w)

#####To create a kernel weights with adaptive bandwidth or using max Knn distance as bandwidth

#adptkernel_w = kernel_knn_weights(OA.Census_12, 6, "uniform")

#summary(adptkernel_w)

###Local Indicators of Spatial Association–LISA
#guerry_path <- system.file("extdata", "Guerry.shp", package = "rgeoda")
#guerry <- st_read(guerry_path)
cci12 <- OA.Census_12["cci_12"]
cci18 <- OA.Census_18["cci_18"]

lisa12 <- local_moran(queen_w_12, cci12)
lisa18 <- local_moran(queen_w_18, cci12)

#####we can call the function lisa_values() to get the values of the local Moran
lms12 <- lisa_values(gda_lisa = lisa12)
lms12
lms18 <- lisa_values(gda_lisa = lisa18)
lms18
##To get the pseudo-p values of significance of local Moran computation

pvals12 <- lisa_pvalues(lisa12)
pvals12

```

```
###To get the cluster indicators of local Moran computation
```

```
##which can be accessed via the function lisa_labels()
```

```
lbls12 <- lisa_labels(lisa12)
```

```
lbls12
```

```
###re-run the above local Moran example using 9,999 permutations.
```

```
set.seed(123)
```

```
lisa12 <- local_moran(queen_w_12, cci12, permutations = 9999)
```

```
lisa18 <- local_moran(queen_w_18, cci18, permutations = 9999)
```

```
#####Get pvalues
```

```
pvals12 <- lisa_pvalues(lisa12)
```

```
pvals12
```

```
pvals18 <- lisa_pvalues(lisa18)
```

```
pvals18
```

```
#rgeoda uses GeoDa C++ code, in which multi-threading is used to accelerate the computation of LISA.  
We can use the argument
```

```
#ncpu to specify how many threads to run the computation
```

```
lisa2012 <- local_moran(queen_w_12, cci12, cpu_threads = 4)
```

```
lisa2018 <- local_moran(queen_w_18, cci18, cpu_threads = 4)
```

```
###Get the False Discovery Rate value based on current pseudo-p values
```

```
fdr12 <- lisa_fdr(lisa2012, 0.05)
```

```
fdr12
```

```
fdr18 <- lisa_fdr(lisa2018, 0.05)
```

```
fdr18
```

```
#Then, one can set the FDR value as the cutoff p-value to filter the cluster results:
```

```
cat_fdr12 <- lisa_clusters(lisa2012, cutoff = fdr12)
```

```

cat_fdr12
cat_fdr18 <- lisa_clusters(lisa2018, cutoff = fdr18)
cat_fdr18

#####Local geary
##For example, we can call the function local_geary() with the created
#Queen weights and the data "crm_prp" as input parameters
cci_2012 <- local_geary(queen_w_12, cci12)
cci_2018 <- local_geary(queen_w_18, cci18)

##To get the cluster indicators of the local Geary computation:
lisa_clusters(cci_2012)
lisa_clusters(cci_2018)

##To get the pseudo-p values of the local Geary computation
lisa_pvalues(cci_2012)
lisa_pvalues(cci_2018)

###6.3 Create Local Moran Map
lisa_colors <- lisa_colors(lisa12)
lisa_labels <- lisa_labels(lisa12)
lisa_clusters <- lisa_clusters(lisa12)

loclis12<- plot(st_geometry(OA.Census_12),
               col=sapply(lisa_clusters, function(x){return(lisa_colors[[x+1]])}),
               border = "#333333", lwd=0.2)
title(main = "Local Moran Map of cci 2012")
legend('bottomleft', legend = lisa_labels, fill = lisa_colors, border = "#eeeeee")

#####For 2018

```

```

lisa_colors <- lisa_colors(lisa18)
lisa_labels <- lisa_labels(lisa18)
lisa_clusters <- lisa_clusters(lisa18)

loclis18<-plot(st_geometry(OA.Census_18),
               col=sapply(lisa_clusters, function(x){return(lisa_colors[[x+1]])}),
               border = "#333333", lwd=0.2)
title(main = "Local Moran Map of cci 2018")
legend('bottomleft', legend = lisa_labels, fill = lisa_colors, border = "#eeeeee")

```

```
#####
```

```

lisa_p <- lisa_pvalues(lisa12)
p_labels <- c("Not significant", "p <= 0.05", "p <= 0.01", "p <= 0.001")
p_colors <- c("#eeeeee", "#84f576", "#53c53c", "#348124")
plot(st_geometry(OA.Census_12),
     col=sapply(lisa_p, function(x){
       if (x <= 0.001) return(p_colors[4])
       else if (x <= 0.01) return(p_colors[3])
       else if (x <= 0.05) return (p_colors[2])
       else return(p_colors[1])
     }
     ),
     border = "#333333", lwd=0.2)
title(main = "Local Moran Map of cci 2012")
legend('bottomleft', legend = p_labels, fill = p_colors, border = "#eeeeee")

```

```
#####
```

```

lisa_p <- lisa_pvalues(lisa18)
p_labels <- c("Not significant", "p <= 0.05", "p <= 0.01", "p <= 0.001")

```

```

p_colors <- c("#eeeeee", "#84f576", "#53c53c", "#348124")
plot(st_geometry(OA.Census_18),
     col=sapply(lisa_p, function(x){
       if (x <= 0.001) return(p_colors[4])
       else if (x <= 0.01) return(p_colors[3])
       else if (x <= 0.05) return (p_colors[2])
       else return(p_colors[1])
     }),
     border = "#333333", lwd=0.2)
title(main = "Local Moran Map of cci 2018")
legend('bottomleft', legend = p_labels, fill = p_colors, border = "#eeeeee")

```

```
#####working with spded
```

```

#)A For 2012 survey Global Moran
#Extracting neighbors(according to Queen)
#9.1 Find queen neighbors
neighbours <- poly2nb(OA.Census_12)
neighbours
neighbours1 <- poly2nb(OA.Census_18)
neighbours1
#Crating weight matrix
neighbours11 <- nb2listw(neighbours,zero.policy=TRUE)
moran.test(OA.Census_12$cci_12, neighbours11)

neighbours2 <- nb2listw(neighbours1,zero.policy=TRUE)
moran.test(OA.Census_18$cci_18, neighbours2)

#neighbours11 |> nb2listw(style="B") -> lw_q_B
#neighbours2 |> nb2listw(style="W") -> lw_q_W

```

```
#####
```

```
glance_hptest <- function(ht) c(ht$estimate,  
                                "Std deviate"=unname(ht$statistic),  
                                "p.value"=unname(ht$p.value))
```

```
(OA.Census_12 |>  
  st_drop_geometry() |>  
  subset(select=DHSREGFR, drop=TRUE) -> Types) |>  
  table()
```

```
(OA.Census_12 |>  
  st_drop_geometry() |>  
  subset(select=cci_12, drop=TRUE) -> z) |>  
  moran.test(listw=neighbours11, randomisation=FALSE) |>  
  glance_hptest()
```

```
(OA.Census_18 |>  
  st_drop_geometry() |>  
  subset(select=cci_18, drop=TRUE) -> z1) |>  
  moran.test(listw=neighbours2, randomisation=FALSE) |>  
  glance_hptest()
```

```
#####Bootstrap compute
```

```
(z |>  
  moran.test(listw=neighbours11) -> mtr) |>  
  glance_hptest()
```

```
(z1 |>  
  moran.test(listw=neighbours2) -> mtr1) |>
```

```
glance_hptest()
```

```
set.seed(1)
```

```
z |>
```

```
moran.mc(listw=neighbours11, nsim=999, return_boot = TRUE) -> mmc
```

```
z1 |>
```

```
moran.mc(listw=neighbours2, nsim=999, return_boot = TRUE) -> mmc1
```

```
c("Permutation bootstrap"=var(mmc$t),
```

```
"Analytical randomisation"=unname(mtr$estimate[3]))
```

```
c("Permutation bootstrap"=var(mmc1$t),
```

```
"Analytical randomisation"=unname(mtr1$estimate[3]))
```

```
#####
```

```
# MORAN scatter plot
```

```
z |> moran.plot(listw=neighbours11, labels=OA.Census_12$ID_2, cex=1, pch=".", xlab="malprev12",  
ylab="lagged malprev12") -> infl_W1
```

```
z1 |> moran.plot(listw=neighbours2, labels=OA.Census_18$ID_2, cex=1, pch=".", xlab="malprev18",  
ylab="lagged malprev18") -> infl_W2
```

```
#####Produce map
```

```
OA.Census_12$hat_value <- infl_W1$hat
```

```
tm_shape(OA.Census_12) + tm_fill("hat_value")
```

```
OA.Census_18$hat_value <- infl_W2$hat
```

```
tm_shape(OA.Census_18) + tm_fill("hat_value")
```

```
#####
```

```
z |>
```

```
localmoran(listw=neighbours11, conditional=FALSE, alternative="two.sided") -> locm
```



z1 |>

```
localmoran(listw=neighbours2, conditional=FALSE, alternative="two.sided") -> locm1
```

```
#####
```

```
pva <- \ (pv) cbind("none"=pv, "bonferroni"=p.adjust(pv, "bonferroni"), "fdr"=p.adjust(pv, "fdr"),  
"BY"=p.adjust(pv, "BY"))
```

locm |>

```
subset(select="Pr(z != E(Ii))", drop=TRUE) |>
```

```
pva() -> pvsp
```

```
f <- \ (x) sum(x < 0.05)
```

```
apply(pvsp, 2, f)
```

```
pva <- \ (pv) cbind("none"=pv, "bonferroni"=p.adjust(pv, "bonferroni"), "fdr"=p.adjust(pv, "fdr"),  
"BY"=p.adjust(pv, "BY"))
```

locm1 |>

```
subset(select="Pr(z != E(Ii))", drop=TRUE) |>
```

```
pva() -> pvsp
```

```
f <- \ (x) sum(x < 0.05)
```

```
apply(pvsp, 2, f)
```

```
#####
```

```
library(parallel)
```

```
set.coresOption(ifelse(detectCores() == 1, 1, detectCores()-1L))
```

```
#####
```

```
system.time(z |>
```

```
  localmoran_perm(listw=neighbours11, nsim=499, alternative="two.sided", iseed=1) -> locm_p)
```

```
system.time(z1 |>
```

```
  localmoran_perm(listw=neighbours2, nsim=499, alternative="two.sided", iseed=1) -> locm_p1)
```

```
#####
```

```
brks <- qnorm(c(0, 0.00001, 0.0001, 0.001, 0.01, 0.025, 0.5, 0.975, 0.99, 0.999, 0.9999, 0.99999, 1))
```

```

(locm_p |>
  subset(select=Z.Ii, drop=TRUE) |>
  cut(brks) |>
  table()-> tab)
#####

z |>
  localmoran(listw=neighbours11, conditional=TRUE, alternative="two.sided") -> locm_c

z1 |>
  localmoran(listw=neighbours2, conditional=TRUE, alternative="two.sided") -> locm_c1

#####

OA.Census_12$locm_Z <- locm[, "Z.Ii"]
OA.Census_12$locm_c_Z <- locm_c[, "Z.Ii"]
OA.Census_12$locm_p_Z <- locm_p[, "Z.Ii"]

#liss12<- tm_shape(OA.Census_12) + tm_fill(c("locm_Z", "locm_c_Z", "locm_p_Z"), breaks=brks,
midpoint=0, title="Standard deviates of\nLocal Moran's I") + tm_facets(free.scales=FALSE, ncol=2) +
tm_layout(panel.labels=c("Analytical total", "Analytical conditional", "Conditional permutation"))

tm_shape(OA.Census_12) + tm_fill(c("locm_Z", "locm_c_Z", "locm_p_Z"), breaks=brks, midpoint=0,
title="Standard deviates of\nLocal Moran's I") + tm_facets(free.scales=FALSE, ncol=2) +
tm_layout(panel.labels=c("Analytical total", "Analytical conditional", "Conditional permutation"))

OA.Census_18$locm_Z1 <- locm1[, "Z.Ii"]
OA.Census_18$locm_c_Z1 <- locm_c1[, "Z.Ii"]
OA.Census_18$locm_p_Z1 <- locm_p1[, "Z.Ii"]

#liss18<- tm_shape(OA.Census_18) + tm_fill(c("locm_Z1", "locm_c_Z1", "locm_p_Z1"), breaks=brks,
midpoint=0, title="Standard deviates of\nLocal Moran's I") + tm_facets(free.scales=FALSE, ncol=2) +
tm_layout(panel.labels=c("Analytical total", "Analytical conditional", "Conditional permutation"))

tm_shape(OA.Census_18) + tm_fill(c("locm_Z1", "locm_c_Z1", "locm_p_Z1"), breaks=brks,
midpoint=0, title="Standard deviates of\nLocal Moran's I") + tm_facets(free.scales=FALSE, ncol=2) +
tm_layout(panel.labels=c("Analytical total", "Analytical conditional", "Conditional permutation"))

#tmap_arrange(liss12,liss18,nrow = 2)

#####

```

```

q_mean <- attr(locm, "quadr")$mean
OA.Census_12$hs_ac_q <- OA.Census_12$hs_cp_q <- OA.Census_12$hs_an_q <- q_mean
is.na(OA.Census_12$hs_an_q) <- !(OA.Census_12$locm_Z < brks[6] | OA.Census_12$locm_Z >
brks[8])
is.na(OA.Census_12$hs_cp_q) <- !(OA.Census_12$locm_p_Z < brks[2] | OA.Census_12$locm_p_Z >
brks[12])
is.na(OA.Census_12$hs_ac_q) <- !(OA.Census_12$locm_c_Z < brks[2] | OA.Census_12$locm_c_Z >
brks[12])

#hotp12<- tm_shape(OA.Census_12) + tm_fill(c("hs_an_q", "hs_ac_q", "hs_cp_q"), colorNA="grey95",
textNA="Not significant", title="Incomplete MPM hotspot status\nLocal Moran's I") +
tm_facets(free.scales=FALSE, ncol=2) + tm_layout(panel.labels=c("Unadjusted analytical total",
"Bonferroni analytical cond.", "Cond. perm. with Bonferroni"))

tm_shape(OA.Census_12) + tm_fill(c("hs_an_q", "hs_ac_q", "hs_cp_q"), colorNA="grey95",
textNA="Not significant", title="Incomplete MPM hotspot status\nLocal Moran's I") +
tm_facets(free.scales=FALSE, ncol=2) + tm_layout(panel.labels=c("Unadjusted analytical total",
"Bonferroni analytical cond.", "Cond. perm. with Bonferroni"))

#####

q_mean <- attr(locm1, "quadr")$mean
OA.Census_18$hs_ac_q <- OA.Census_18$hs_cp_q <- OA.Census_18$hs_an_q <- q_mean
is.na(OA.Census_18$hs_an_q) <- !(OA.Census_18$locm_Z1 < brks[6] | OA.Census_18$locm_Z >
brks[8])
is.na(OA.Census_18$hs_cp_q) <- !(OA.Census_18$locm_p_Z1 < brks[2] | OA.Census_18$locm_p_Z >
brks[12])
is.na(OA.Census_18$hs_ac_q) <- !(OA.Census_18$locm_c_Z1 < brks[2] | OA.Census_18$locm_c_Z >
brks[12])

#hotp18<- tm_shape(OA.Census_18) + tm_fill(c("hs_an_q", "hs_ac_q", "hs_cp_q"), colorNA="grey95",
textNA="Not significant", title="Incomplete MPM hotspot status\nLocal Moran's I") +
tm_facets(free.scales=FALSE, ncol=2) + tm_layout(panel.labels=c("Unadjusted analytical total",
"Bonferroni analytical cond.", "Cond. perm. with Bonferroni"))

tm_shape(OA.Census_18) + tm_fill(c("hs_an_q", "hs_ac_q", "hs_cp_q"), colorNA="grey95",
textNA="Not significant", title="Incomplete MPM hotspot status\nLocal Moran's I") +
tm_facets(free.scales=FALSE, ncol=2) + tm_layout(panel.labels=c("Unadjusted analytical total",
"Bonferroni analytical cond.", "Cond. perm. with Bonferroni"))

tmap_arrange(hotp12,hotp18,nrow = 2)

```

```
#save.image(file =("D:\\MOOC\\diospat_v1.RData"))
```

```
load("D:\\MOOC\\diospat_v1.RData")
```

```
#####Interpolation_Krigging
```
